# Supplementary material for: Decrease in scale invariance of activity fluctuations with aging and in patients with suprasellar tumors
Source: PubMed Central journal article supplement — Chronobiol Int. Author manuscript; Available in PMC 2018 Mar 22. (PMC5862770; doi:10.1080/07420528.2017.1407779), 2017-11-28

## **SUPPLEMENTARY DATA**

### Definition of hypopituitarism

Corticotropin (ACTH) deficiency was defined as an insufficient increase in cortisol levels ( $<0.55$   $\mu\text{mol/L}$ ) after an insulin tolerance test (ITT) or corticotropin releasing hormone stimulation test.

Thyrotropin (TSH) deficiency was defined as free thyroxin levels below the reference range ( $<10$   $\text{pmol/L}$ ). Hypogonadism was defined as low testosterone levels ( $<8.0$   $\text{nmol/L}$ ) in men, and absence of menstrual cycle for more than one year in the presence of low estrogen levels in premenopausal women. Growth hormone deficiency was defined as a growth hormone peak response to the ITT below  $3$   $\mu\text{g/L}$  (glucose nadir  $<2.2$   $\text{mmol/L}$ ) or growth hormone releasing hormone / arginine test (with body mass index – adjusted growth hormone cut-offs) in case of contraindications for the ITT, according to guidelines (1).

1. Ghigo E, Aimaretti G, Corneli G. Diagnosis of adult GH deficiency. Growth Horm. IGF. Res. 2008;18(1):1-16.

**Supplemental Figure 1.** Scaling exponent  $\alpha_3$  (times scales 10-24 h) in 75 Dutch patients (NFMA and craniopharyngioma) by wrist activity in counts, in patients over or under 66 years old.

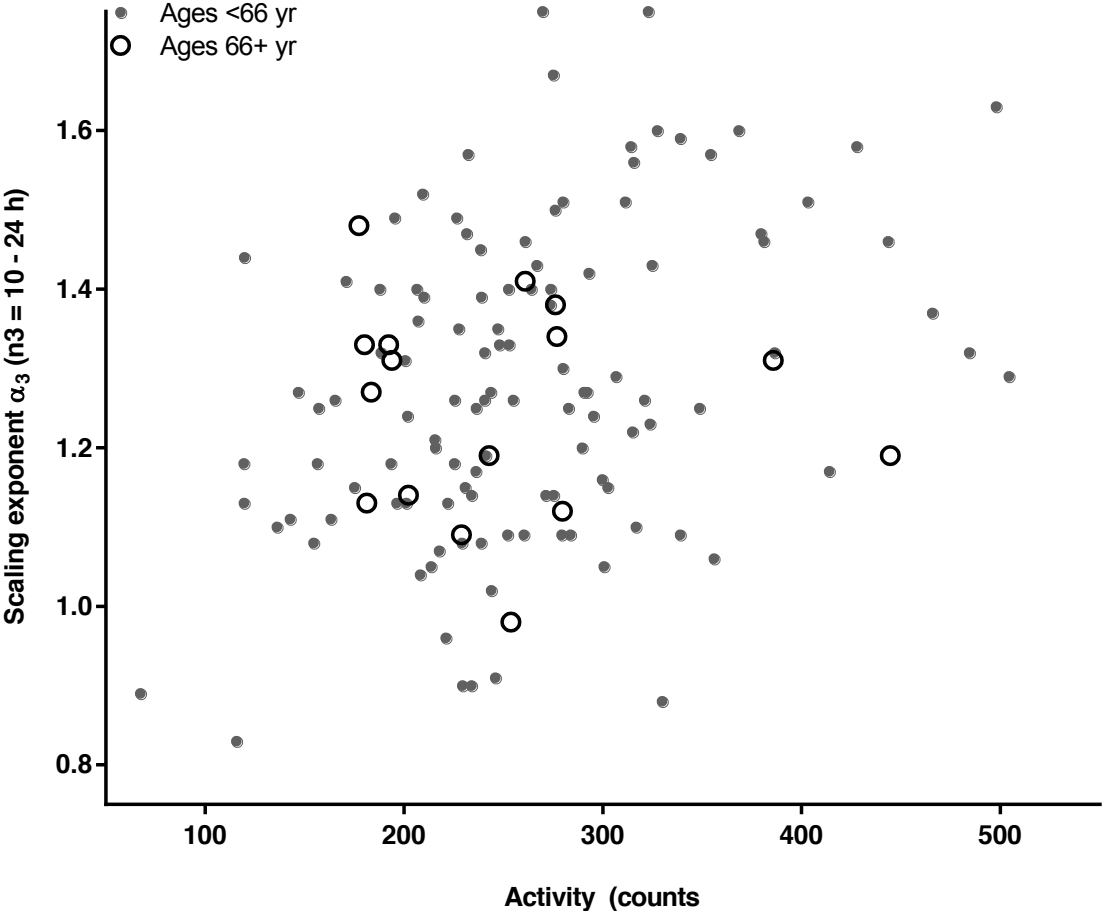

**Supplemental Figure 2.** Scaling exponent  $\alpha_2$  (times scales 1.5-10 h) in 75 Dutch patients (NFMA and craniopharyngioma) by wrist activity in counts, in patients that either did or did not receive radiotherapy.

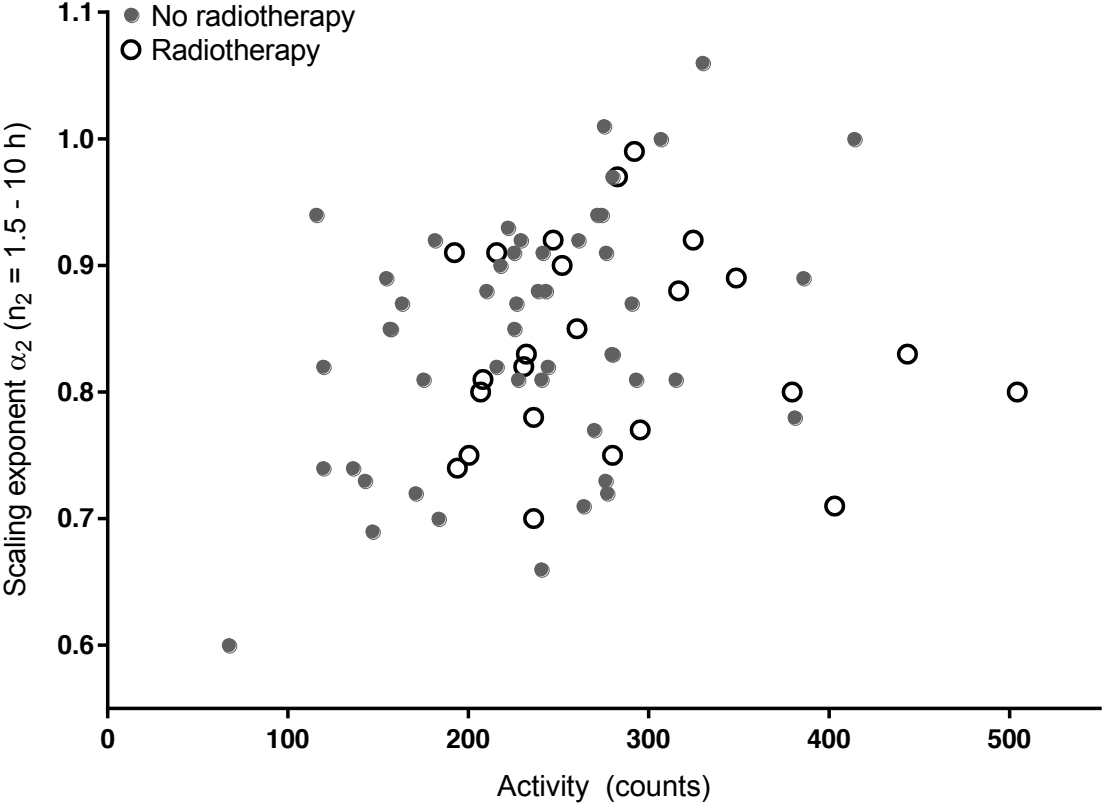

Supplement: NIHMS937341-supplement-supplement_1.pdf [file NIHMS937341-supplement-supplement_1.pdf]
